# Supplementary material
Source: Research Square preprint supplement (doi:10.21203/rs.3.rs-9528680/v1)
Supplement: Supplementary file 2 [file 1b9b0d44b075601124904605.xlsx]

## Sheet: Cohort
Investigating vulnerability to concussion through rare ion channel and neurotransmitter genetic variants
Bridget H Maher, Neven Maksemous, Heidi G Sutherland, Robert A Smith, Omar Dabash, Annette Greenhow, Fatima A Nasralla, Dale R Nyholt, Arn M J M van den Maagdenberg, Rod A Lea, and Lyn R Griffiths*
Genomics Research Centre, Centre for Genomics and Personalised Health, School of Biomedical Sciences, Faculty of Health, Queensland University of Technology, Brisbane, Queensland, Australia
*lyn.griffiths@qut.edu.au
Supplementary Table 1. Available concussion information for study cohort.
Sample ID	Concussion info
CN1	hockey ball to the temple, ~month recovery time, other minor concusisons without hospitalisation. Migraine with Aura since age 22.
CN4	3 falls during childhood (related to play not sport), recovery ~6months. Long-term conditions include brief, infrequent hemi-sensory events, imaging identified white matter lesions to right internal capsule
CN5	5-6 sports (Rugby) related concusions, recovery a few days
CN6	2 Concussions with 0.5min and 1min unconciousness at age 16 and 18 related to sport (AFL football)
CN7	Response to minor Head Trauma: migraine/prolonged headaches/visual distrubances/memory problems, brother (CN08) suffered same response, parents history a bit unclear. Multiple concussions (sports related - Rugby) with recovery 2-3 days. Other conditions include Anxiety and short term memory loss (age of onset 20y.o).
CN9	Response to minor Head Trauma: migraine/prolonged headaches/visual distrubances. Recovery 4-5days
CN10	Single concussion with ~18month recovery time, still suffering mental fatigue with occasional memory disturbances (eg. Remembering directions to a well visited place, codes used daily) and visual disturbances.
CN11	Multiple (4) concussions due to sport (x2), jet ski accident, glass door impact. Recovery for most recent two consussions took several weeks with ongoing sensitivity to loud noises and bright lights. Suffers Migraine without Aura (onset age 30) with maternal family history.
CN15	3-5 concussions, recovery approx 2 weeks experienced Migraine with Aura and memory problems. Ongoing issues memory retention, irritibility. Suffers Migraine with Aura age of onset 22y.o. and irregular heartbeat.
CN18	Multiple concussions over the span of a year, recovery time 4-6 weeks. No ongoing symptoms. Short term memory loss age of onset 16y.o
CN22	6-10 concussions, recovery one week, Migraine for approx 2 years post concussion, no current ongoing symptoms.
CN24	Multiple events from MMA training - 1:kicked in head and knocked out; 2: one month later hit in back of head with brief loss of conciousness; 3: one month later impact to back of head with loss of conciousness - Emergency room visit. Digagnosed with Post concussion syndrome one month later. Ongoing symptoms 3.5 years post event, including fatigue, tinnitus, vertigo, migraine. Short-term memory lo…
CN25	Single concussion with 2 year recovery time, ongoing symptoms include brain fog, memory issues, noise and light sensitivity
CN26	Fell from horse age 52. Ongoing symptoms include disordered taste and smell, headaches with photophobia, poor concentration, vertigo, nausea.
CN27	6 Concussions (4 from Rugby, 2 accidents), recover >1 year with ongoing diagnosed post concussion syndrome, symptoms have included Migraine without aura and memory problems.
CN28	Multiple concussions. 1: Major concussion, unconcious fro 5 mins, amnesia. 2: 2 years later, minor concussion, no loss of conciousness. 3: Major concussion including seizure, loss of conciousneess for 5 mins and amnesia. Recovery from 1st and 3rd events 6 months inclyding headaches, lack of concentration and inability to multi-task. Also suffers Migraine, age of onset 22 y. o
CN29	Approx 12 concussions, symptoms included Migraine with Aura, memory loss
CN30	Fractured skull age 5 from bike accident, 9 Rugby related concussions across a decade period. Stopped playing sport od advice from doctor. 2 week recovery time. Only ongoing symptom is 'pressure'
CN31	2 concussions approx 3 years apart. Diagnosed post concussion syndrome post second concussion, symptoms ongoing at 4 months post concussion including headaches, memory loss, confusion, paid on one side of face, fatigue and lack of concentration
CN32	Multiple concussions between age 12-25. No ongoing symptoms
CN33	Multiple concussions (5-7) from age 12-21. Revocery time usually 1-2 weeks, although most recent concussion effects lasting 4 months including Migraine with Aura.
CN39	Multiple concussions - 2 horse riding, 1 falling from bunk bed. Recovery 2 weeks in hospital, 6 months ongoing symptoms including Migraine with Aura.
CN40	Multiple concussions - car accident as an infant, 3 additional concussions with symptoms including Migraine with Aura and memory problems.
CN41	Multiple concussions over 20 years, plays Rugby Union. No ongoing symptoms
C1	One or more concussions
C2	One or more concussions
C3	One or more concussions
C4	One or more concussions
C5	One or more concussions
C6	One or more concussions
C7	One or more concussions
C8	One or more concussions
BBB3	hospitalised with concussion
BBB7	hospitalised with concussion
BBB8	hospitalised with concussion
BBB10	hospitalised with concussion
BB11	hospitalised with concussion
BB12	hospitalised with concussion
BBB13	hospitalised with concussion
BBB15	hospitalised with concussion
BBB17	hospitalised with concussion
BBB19	hospitalised with concussion
BBB27	hospitalised with concussion
R111	same as father R111, unusual clinical syndrome, where after minor head trauma the have a "migraine like"episode with slurred speech, diplopia, headache and vomiting. Short note: repeated attacks of "concussion" after minor head trauma.
R117	recurrent episodes of pallor and vomiting following minor head injuries. Slurred speech with inappropriate words . After that she had a mild biparietal headache on most days, these headaches usually last for several minutes and resolve spontaneously. She is still sensitiveto loud noises and was sensitive to light for three weeks following the event. Mother hase a history of migraines but there is…
R118	catastrophic cerelral oedema following trivial injury, mum has had hemiplegic migraines
R120	severe bleed following suspected minor fall. He had only a relatively minor fall, which was followed by malignant cerebral oedema and a relatively smal sbdural bleed with uncal herniation within half an hour of the fall there is no history or family history of migraine.
R150	Ischaemic stroke after mild head injury
R167	head injury induced migraine
R170	Confusional migraine following minor head injury
R171	Acute confusional migraine after head injury
R197	Migraine on minimal trauma, has two episodes of confusion and headache post rugby games.
R206	he had had a concussion and four days after that he developed a similar apttern of left sided numbness.
R211	severe migraine and ataxia following head injury
R222	Multiple episodes of visual disturbance, headache and vomiting following trivial head trauma. Multiple episodes in the last few months, the most recent after hitting head against boys chest at basketball.
R240	Family history of migraine. Netball hit head, lead to headache and confusion and Left-sided QVM-something?
R256	2 episodes of stroke, one related to minor trauma, episodic ataxia, global developmental delay, no language skills, microencephaly, seizure disorder and episodic movement disorder characterised by dyskinesia, more likely to occur prior to meals.
R259	Presumed hemiplegic migraine. Playing netball at school and was hit on the side of the head on the right side of her temple. At the time she was hit she noted things suddenly went black and then quickly recovered. During the course of a soccer game she bacame more confused and then presented to ER with hemiplegia. This resolved and she rapidly returned to normal. Previous MRI of brain was normal.…
P008	Multiple concussions, no loss of consciousness, headaches, neck trouble
P009	Single concussion, loss of consciousness, headache, neuropathy, also reported cerebral vascular accident (CVA)
P011	Car accident + multiple concussions, loss of consciousness, headache, dizziness
P018	Multiple concussions, loss of consciousness, amnesia, neuropathy
P021	Fall - single concussion, loss of consciousness, amnesia, confusion, headache, neuropathy
P026	Multiple concussions, loss of consciousness, neuropathy, also reported nerve compression related to spine disease
P027	Multiple concussions, no loss of consciousness
P034	Fall - single concussion, loss of consciousness, amnesia, confusion, headache
P035	Multiple concussions, loss of consciousness
P038	Multiple concussions, confusion, headache, also reported intravascular calcification
P047	Multiple concussions, loss of consciousness, headache, neck pain, neuropathy, shakes in right hand when stressed
P049	Multiple concussions, loss of consciousness
P075	Car accident - single concussion, no loss of consciousness, headache, neuropathy, Bell's Palsy
P095	Single concussion, no loss of consciousness, amnesia, confusion, headache, also reported suspected stroke
P159	Fall + multiple concussions, loss of consciousness, amnesia, confusion, headache, also have been referred for pain to left hip/groin due to L4,5,6 crushing
P160	Car accident - single concussion, loss of consciousness, headache, neuropathy
P178	Car accident - single concussion, loss of consciousness, confusion, headache, also has been referred for pain to left ear
P186	Fall - single concussion, no loss of consciousness, confusion, headache
P190	Car accident - single concussion, loss of consciousness, amnesia, confusion, headache, emotional changes, irritability, sleep disturbances
P191	Single concussion, loss of consciousness, headache
P194	Fall - single concussion, no loss of consciousness, confusion, headache
P198	Multiple concussions, loss of consciousness
P200	One or more concussions, headache, subarachnoid haemorrhge
P202	Car accident - single concussion, loss of consciousness
P211	Single concussion, loss of consciousness, headache, also reported 2x transient ischemic attacks (TIA), 2x CVA, epilepsy episode
P215	Single concussion, no loss of consciousness, confusion, headache
P224	Multiple concussions, loss of consciousness, headache
P232	Fall + multiple concussions, loss of consciousness, amnesia, confusion, headache, emotional changes, irritability, sleep disturbances
P235	Fall - single concussion, loss of consciousness, headache, neuropathy, also has reported nerve damage secondary to leg injury
P242	Multiple concussions, loss of consciousness, headache
P251	Multiple concussions, loss of consciousness, headache
P254	Fall - single concussion, loss of consciousness, headaches, also has reported sciatica
P270	Multiple concussions, loss of consciousness
P291	Car accident + multiple concussions, loss of consciousness
P307	Single concussion, headache
