# Supplementary material
Source: Research Square preprint supplement (doi:10.21203/rs.3.rs-9528680/v1)
Supplement: Supplementary file 3 [file 3077dbd9d68fd8fc727b5e7f.xlsx]

## Sheet: Burden Analysis
Investigating vulnerability to concussion through rare ion channel and neurotransmitter genetic variants
Bridget H Maher, Neven Maksemous, Heidi G Sutherland, Robert A Smith, Omar Dabash, Annette Greenhow, Fatima A Nasralla, Dale R Nyholt, Arn M J M van den Maagdenberg, Rod A Lea, and Lyn R Griffiths*
Genomics Research Centre, Centre for Genomics and Personalised Health, School of Biomedical Sciences, Faculty of Health, Queensland University of Technology, Brisbane, Queensland, Australia
*lyn.griffiths@qut.edu.au
Supplementary Table 5. Variants and allele counts for burden testing of ion channel genes.
Gene	Variant details						GnomAD NFE data			Cohort data
	Locus	Ref	Amino Acid Change	Coding change	SNP ID	Samples with Variant	Variant Allele count	Total Allele count	Freq	Cohort allele count	Cohort Total Allele count	Cohort Freq.
CACNA1A	chr19:13428124	C	p.Ala454Thr	c.1360G>A	rs41276886	CN7, P034, P038	265	47808	0.00554301	3	186	0.016129
SCN1A	chr2:166848003	G	p.Arg1917Gly	c.5749C>G	rs121917956	CN11, C2	67	48282	0.00138768	2	186	0.0107527
ATP10A	chr15:25947181	G	p.Ala881Val	c.2642C>T	rs142704035	R170	16	113700	0.0001407	1	186	0.00537634
	chr15:26108002	T	p.Glu81Gly	c.242A>G	rs368768805	CN27	11	107790	0.0001021	1	186	0.00537634
ATP13A4	chr3:193132450	T	p.Asn978His	c.2932A>C	rs770185624	CN18	5	113740	4.396e-05	1	186	0.00537634
ATP7B	chr13:52511656	C	p.Gly1287Ser	c.3859G>A	rs762866453	P254	1	113286	8.827e-06	1	186	0.00537634
	chr13:52511815	C	p.Val1234Phe	c.3700G>T	rs193922108	P018	0	113194	0	1	186	0.00537634
	chr13:52520508	G	p.Thr991Met	c.2972C>T	rs41292782	C4	266	112746	0.002359	1	186	0.00537634
	chr13:52531716	G	p.Leu795Phe	c.2383C>T	rs751710854	R211	4	113288	3.531e-05	1	186	0.00537634
	chr13:52542732	C	p.Val519Met	c.1555G>A	rs192957846	CN25	127	113118	0.001123	1	186	0.00537634
	chr13:52549234	T	p.Asn41Ser	c.122A>G	rs201738967	P224	55	113168	0.000486	1	186	0.00537634
CACNA1B	Chr9:140952560	G	p.Arg1389His	c.4166G>A	rs184841813	BBB19	78	113040	0.00069	1	186	0.00537634
	chr9:141015296	C	p.Ser2151Leu	c.6452C>T	rs200034261	P235	37	75310	0.0004913	1	186	0.00537634
CACNA1C	chr12:2690844	A	p.Ile662Leu	c.1984A>C	.	R259	0	.	.	1	186	0.00537634
	chr12:2774859	A	p.Tyr1552Cys	c.4655A>G	rs2153709630	C5	0	.	.	1	186	0.00537634
	chr12:2800220	A	p.Asn2174Ser	c.6521A>G	rs201090446	BB12	69	104020	0.0006633	1	186	0.00537634
CACNA1D	chr3:53787624	A	p.Asn1254Ser	c.3761A>G	rs147146258	P186	78	113768	0.0006856	1	186	0.00537634
	chr3:53837487	C	p.Arg1845Trp	c.5533C>T	rs144688228	CN4	17	113770	0.0001494	1	186	0.00537634
	chr3:53844173	G	p.Gly2034Ser	c.6100G>A	rs368340190	CN15	7	113558	6.164e-05	1	186	0.00537634
CACNA1E	chr1:181706777	C	p.Ser1180Leu	c.3539C>T	rs202226007	P200	4	112714	3.549e-05	1	186	0.00537634
	chr1:181759588	C	p.Arg1932Trp	c.5794C>T	rs776416674	BB12	6	112858	5.316e-05	1	186	0.00537634
	chr1:181767528	G	p.Arg2167Gln	c.6500G>A	rs370385055	P242	7	112966	6.197e-05	1	186	0.00537634
CACNA1I	chr22:40045653	C	p.Ser537Leu	c.1610C>T	rs372904212	P191	6	44670	0.0001343	1	186	0.00537634
	chr22:40081856	G	p.Asp2005Tyr	c.6013G>T	rs771105041	P186	42	27346	0.001536	1	186	0.00537634
	chr22:39994250	C	p.Arg111Gly	c.331C>G	rs751729397	R211	1	103132	9.696e-06	1	186	0.00537634
CACNB2	chr10:18789787	G	p.Cys168Tyr	c.503G>A	rs773215003	P200	2	113632	1.76e-05	1	186	0.00537634
	chr10:18827118	G	p.Asp438Asn	c.1312G>A	rs778466195	C2	1	113742	8.792e-06	1	186	0.00537634
	chr10:18827163	C	p.Leu453Phe	c.1357C>T	rs145638628	CN29	48	113762	0.0004219	1	186	0.00537634
KCNJ10	chr1:160011262	T	p.Lys354Arg	c.1061A>G	rs142596580	CN32	54	113678	0.000475	1	186	0.00537634
	chr1:160012271	G	p.Arg18Trp	c.52C>T	rs138457635	R117	78	113716	0.0006859	1	186	0.00537634
KCNT2	chr1:196250115	T	p.Lys929Glu	c.2785A>G	rs1659036452	CN7	0	.	.	1	186	0.00537634
	chr1:196309627	T	p.Ile543Leu	c.1627A>C	rs780602272	P095	5	113102	4.421e-05	1	186	0.00537634
SCN9A	chr2:167089942	G	p.Leu1267Val	c.3799C>G	rs180922748	CN10	212	102260	0.002073	1	186	0.00537634
	chr2:167094638	T	p.Asn1245Ser	c.3734A>G	rs141268327	R211, P026, R171	837	111518	0.007506	3	186	0.016129
	chr2:167108386	G	p.Arg1110Trp	c.3328C>T	rs190664764	R256	166	112256	0.001479	1	186	0.00537634
	chr2:167137020	C	p.Trp719Cys	c.2157G>C	rs202055175	BBB7	3	91662	3.273e-05	1	186	0.00537634
	chr2:167145152	G	p.Thr370Met	c.1109C>T	rs200391162	BBB27	1	102700	9.737e-06	1	186	0.00537634
	chr2:167160752	G	p.Ile228Met	c.684C>G	rs71428908	CN10	194	113030	0.001716	1	186	0.00537634
SCN10A	chr3:38743402	C	p.Ala1529Thr	c.4585G>A	rs757916036	P232	1	113512	8.81e-06	1	186	0.00537634
	chr3:38753882	C	p.Val1287Ile	c.3859G>A	rs145032037	CN1	126	113524	0.00111	1	186	0.00537634
	chr3:38755450	C	p.Arg1268Gln	c.3803G>A	rs138832868	BBB3	313	113532	0.002757	1	186	0.00537634
	chr3:38770143	G	p.Arg844Cys	c.2530C>T	rs140158387	P307	2	113548	1.76e-05	1	186	0.00537634
SCN8A	Chr12:52162823	C	p.Arg1026Cys	c.3076C>T	rs117217073	CN18, R167, BBB15, P194	1663	112888	0.01473	4	186	0.0215054
							4875	4139334	0.00117773	51	7998	0.00637659
