# Supplementary material
Source: Research Square preprint supplement (doi:10.21203/rs.3.rs-9528680/v1)
Supplement: Supplementary file 4 [file 5d2dfdc3a54ce7457ce42782.xlsx]

## Sheet: Ion channel genes
Investigating vulnerability to concussion through rare ion channel and neurotransmitter genetic variants
Bridget H Maher, Neven Maksemous, Heidi G Sutherland, Robert A Smith, Omar Dabash, Annette Greenhow, Fatima A Nasralla, Dale R Nyholt, Arn M J M van den Maagdenberg, Rod A Lea, and Lyn R Griffiths*
Genomics Research Centre, Centre for Genomics and Personalised Health, School of Biomedical Sciences, Faculty of Health, Queensland University of Technology, Brisbane, Queensland, Australia
*lyn.griffiths@qut.edu.au
ATP10A
ATP10B
ATP10D
ATP11A
ATP11A-AS1
ATP11AUN
ATP11B
ATP11C
ATP12A
ATP13A1
ATP13A2
ATP13A3
ATP13A4
ATP13A4-AS1
ATP13A5
ATP13A5-AS1
ATP1A1
ATP1A1-AS1
ATP1A1OS
ATP1A2
ATP1A3
ATP1A4
ATP1B1
ATP1B1P1
ATP1B2
ATP1B3
ATP1B3-AS1
ATP1B3P1
ATP1B4
ATP23
ATP2A1
ATP2A1-AS1
ATP2A2
ATP2A3
ATP2B1
ATP2B2
ATP2B2-IT1
ATP2B2-IT2
ATP2B3
ATP2B4
ATP2C1
ATP2C2
ATP4A
ATP4B
ATP5A1
ATP5A1P1
ATP5A1P10
ATP5A1P2
ATP5A1P3
ATP5A1P5
ATP5A1P6
ATP5A1P7
ATP5A1P8
ATP5A1P9
ATP5B
ATP5BP1
ATP5C1
ATP5C1P1
ATP5D
ATP5E
ATP5EP1
ATP5EP2
ATP5F1
ATP5F1P1
ATP5F1P2
ATP5F1P3
ATP5F1P4
ATP5F1P5
ATP5F1P6
ATP5F1P7
ATP5G1
ATP5G1P1
ATP5G1P3
ATP5G1P4
ATP5G1P5
ATP5G1P6
ATP5G1P7
ATP5G1P8
ATP5G2
ATP5G2P1
ATP5G2P3
ATP5G2P4
ATP5G3
ATP5H
ATP5HP1
ATP5I
ATP5J
ATP5J2
ATP5J2LP
ATP5J2P3
ATP5J2P6
ATP5J2-PTCD1
ATP5JP1
ATP5L
ATP5L2
ATP5LP2
ATP5LP3
ATP5LP4
ATP5LP5
ATP5LP6
ATP5LP7
ATP5O
ATP5S
ATP5SL
ATP6AP1
ATP6AP1L
ATP6AP2
ATP6C
ATP6V0A1
ATP6V0A2
ATP6V0A4
ATP6V0B
ATP6V0C
ATP6V0CP1
ATP6V0CP2
ATP6V0CP3
ATP6V0D1
ATP6V0D2
ATP6V0E1
ATP6V0E1P1
ATP6V0E1P2
ATP6V0E1P3
ATP6V0E1P4
ATP6V0E2
ATP6V0E2-AS1
ATP6V1A
ATP6V1B1
ATP6V1B1-AS1
ATP6V1B2
ATP6V1C1
ATP6V1C2
ATP6V1D
ATP6V1E1
ATP6V1E1P1
ATP6V1E2
ATP6V1F
ATP6V1G1
ATP6V1G1P2
ATP6V1G1P3
ATP6V1G1P4
ATP6V1G1P6
ATP6V1G1P7
ATP6V1G2
ATP6V1G2-DDX39B
ATP6V1G3
ATP6V1H
ATP7A
ATP7B
ATP8A1
ATP8A2
ATP8A2P1
ATP8A2P2
ATP8A2P3
ATP8B1
ATP8B2
ATP8B3
ATP8B4
ATP8B5P
ATP9A
ATP9B
ATPAF1
ATPAF2
ATPIF1
CACNA1A
CACNA1B
CACNA1C
CACNA1C-AS1
CACNA1C-AS2
CACNA1C-AS3
CACNA1C-AS4
CACNA1C-IT1
CACNA1C-IT2
CACNA1C-IT3
CACNA1D
CACNA1E
CACNA1F
CACNA1G
CACNA1G-AS1
CACNA1H
CACNA1I
CACNA1S
CACNA2D1
CACNA2D2
CACNA2D3
CACNA2D3-AS1
CACNA2D4
CACNB1
CACNB2
CACNB3
CACNB4
CACNG1
CACNG2
CACNG3
CACNG4
CACNG5
CACNG6
CACNG7
CACNG8
CLCA1
CLCA2
CLCA3P
CLCA4
CLCC1
CLCF1
CLCN1
CLCN2
CLCN3
CLCN4
CLCN5
CLCN6
CLCN7
CLCNKA
CLCNKB
CLCP2
KCNA1
KCNA10
KCNA2
KCNA3
KCNA4
KCNA5
KCNA6
KCNA7
KCNAB1
KCNAB1-AS1
KCNAB1-AS2
KCNAB2
KCNAB3
KCNB1
KCNB2
KCNC1
KCNC2
KCNC3
KCNC4
KCNC4-AS1
KCND1
KCND2
KCND3
KCND3-AS1
KCND3-IT1
KCNE1
KCNE1B
KCNE1L
KCNE2
KCNE3
KCNE4
KCNE5
KCNF1
KCNG1
KCNG2
KCNG3
KCNG4
KCNH1
KCNH1-IT1
KCNH2
KCNH3
KCNH4
KCNH5
KCNH6
KCNH7
KCNH8
KCNIP1
KCNIP2
KCNIP2-AS1
KCNIP3
KCNIP4
KCNIP4-IT1
KCNJ1
KCNJ10
KCNJ11
KCNJ12
KCNJ13
KCNJ14
KCNJ15
KCNJ16
KCNJ18
KCNJ2
KCNJ2-AS1
KCNJ3
KCNJ4
KCNJ5
KCNJ6
KCNJ6-IT1
KCNJ8
KCNJ9
KCNK1
KCNK10
KCNK12
KCNK13
KCNK15
KCNK15-AS1
KCNK16
KCNK17
KCNK18
KCNK2
KCNK3
KCNK4
KCNK4-TEX40
KCNK5
KCNK6
KCNK7
KCNK9
KCNMA1
KCNMA1-AS1
KCNMA1-AS2
KCNMA1-AS3
KCNMB1
KCNMB2
KCNMB2-AS1
KCNMB3
KCNMB3P1
KCNMB4
KCNN1
KCNN2
KCNN3
KCNN4
KCNQ1
KCNQ1-AS1
KCNQ1DN
KCNQ1OT1
KCNQ2
KCNQ3
KCNQ4
KCNQ5
KCNQ5-AS1
KCNQ5-IT1
KCNRG
KCNS1
KCNS2
KCNS3
KCNT1
KCNT2
KCNU1
KCNV1
KCNV2
SCN10A
SCN11A
SCN1A
SCN1B
SCN2A
SCN2B
SCN3A
SCN3B
SCN4A
SCN4B
SCN5A
SCN7A
SCN8A
SCN9A
SCNM1
SCNN1A
SCNN1B
SCNN1D
SCNN1G

## Sheet: Neurotransmitter related genes
ABAT
ACHE
AGTPBP1
ALDH5A1
ALDH9A1
AP2B1
AP3D1
APBA1
ARHGAP44
ARHGEF40
ASIC1
ATP1A2
ATP2A2
BAIAP3
BRSK1
C2CD4A
C2CD4B
C2CD4C
C2CD4D
C7orf50
CACNA1A
CACNA1B
CASK
CHAT
CHRNB4
CLN3
COMT
CPLX1
CPLX4
DAGLA
DAGLB
DDC
DGKI
DMD
DNAJC5
DNM3
DOC2A
DOC2B
DRD1
DRD2
DRD3
DRD4
DRD5
DTNBP1
DVL1
EIF3G
FMR1
GABRA2
GABRQ
GAD1
GAD2
GFAP
GLUL
GPER1
GPR52
GPR82
GRIA1
GRIN1
GRIN3B
GRIPAP1
GRM1
GRM4
GRM5
GRM5
HIP1
HRH3
HSPA8
HTR1A
HTR1B
HTR1E
HTR1F
HTR2A
HTR2C
HTR5A
ICA1
INO80E
JARID2
JMJD4
KCNC4
KCNK15
KCNMB4
KIF17
KIF4A
KIF5A
LIN7A
LIN7B
LYNX1
LYPD6
MAOA
MCTP1
MEF2C
MPV17L2
NAAA
NAALAD2
NF1
NIPSNAP1
NOS1
NRG1
NRXN1
NRXN2
NRXN3
OR10H1
OR10H2
OR10H3
OR10H4
OR10H5
OR10J5
OR11H4
OR13F1
OR56A1
OR56A4
OR56A5
OR5T1
OR5T2
OR5T3
OR6T1
ORC6
P2RY11
PAH
PATE1
PATE4
PDE1B
PDZD11
PNKD
PPAN
PPFIA1
PPFIA2
PPFIA3
PPFIA4
PPP1R9A
PRIMA1
PRKN
PTPRN2
RAB11A
RAB3A
RAB3GAP1
RAB8A
RABGAP1L
RHOT1
RIMS1
RIMS2
RIMS3
RIMS4
RPH3A
SCRIB
SLC17A6
SLC17A7
SLC17A8
SLC18A1
SLC18A2
SLC18A3
SLC1A3
SLC22A1
SLC22A2
SLC38A1
SLC6A1
SLC6A1
SLC6A11
SLC6A12
SLC6A13
SLC6A14
SLC6A15
SLC6A16
SLC6A17
SLC6A18
SLC6A19
SLC6A2
SLC6A20
SLC6A3
SLC6A5
SLC6A6
SLC6A7
SLC6A8
SLC6A9
SLC6A9
SLURP2
SNAP25
SNAP47
SNAP47
SNCAIP
SNCG
SNPH
SRRT
STX1A
STX1B
STX3
STXBP1
SV2A
SV2B
SV2C
SYN1
SYN3
SYNJ1
SYT1
SYT11
SYT11
SYT15
SYT15
SYT16
SYT17
SYT2
SYT3
SYT4
SYT5
SYT6
SYT8
SYT9
SYTL1
SYTL2
SYTL3
SYTL4
TC2N
TH
TSPOAP1
UFSP1
UNC13A
UNC13B
VPS35
VPS35
WNT7A
